# Supplementary material for: Lnc-SGK1 induced by Helicobacter pylori infection and highsalt diet promote Th2 and Th17 differentiation in human gastric cancer by SGK1/Jun B signaling
Source: PubMed Central journal article supplement (PMC4991474; doi:10.18632/oncotarget.7823), 2016-03-01
Supplement: oncotarget-07-20549-s001.pdf [file oncotarget-07-20549-s001.pdf]

SUPPLEMENTARY FIGURES

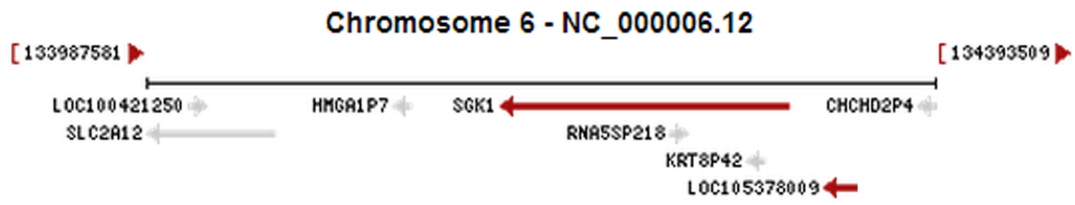

Supplementary Figure S1: Chromosomal location of SGK1 and lnc-SGK1.

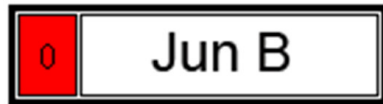

was predicted in:

|               |         |         |         |          |                |
|---------------|---------|---------|---------|----------|----------------|
| Sequence      | TGACTCA | TGACTTA | TGACTTA | TGTGTCA  | TAAGTCA        |
|               | 325     | 331 563 | 569 625 | 631 1496 | 1502 1698 1704 |
| Dissimilarity | 0.00%   | 1.83%   | 1.83%   | 2.14%    | 1.83%          |
| RE equally    | 0.12207 | 0.36621 | 0.36621 | 0.36621  | 0.36621        |
| RE query      | 0.12844 | 0.39838 | 0.39838 | 0.39838  | 0.39838        |

Supplementary Figure S2: Detailed binding site of JUN B in the promoter region of Inc-SGK1.
